# Supplementary material for: microRNA-7 as a tumor suppressor and novel therapeutic for adrenocortical carcinoma
Source: PubMed Central journal article supplement (PMC4742203; doi:10.18632/oncotarget.5383), 2015-10-01
Supplement: oncotarget-06-36675-s001.pdf [file oncotarget-06-36675-s001.pdf]

**Supplementary Table S1: Selected predicted targets for experimental validation**

| <b>Target</b>  | <b>Pathway</b>               |
|----------------|------------------------------|
| <i>MTOR</i>    | <i>MTOR signalling</i>       |
| <i>EIF4E</i>   | <i>MTOR signalling</i>       |
| <i>PIK3CD</i>  | <i>MTOR signalling</i>       |
| <i>RPS6KB1</i> | <i>MTOR signalling</i>       |
| <i>RAF1</i>    | <i>MAPK signalling</i>       |
| <i>IGF1-R</i>  | <i>Akt signalling</i>        |
| <i>EGFR</i>    | <i>MAPK signalling</i>       |
| <i>IRS2</i>    | <i>Insulin signalling</i>    |
| <i>RB1</i>     | <i>Cell Cycle signalling</i> |
| <i>SP1</i>     | <i>TGF-Beta signalling</i>   |
